# Supplementary material for: A correlation between small-molecule dependent nanomorphology and device performance of organic light-emitting diodes with ternary blend emitting layers
Source: Royal Society of Chemistry journal article supplement (doi:10.1039/c7tc02404e), 2017-01-01
Supplement: c7tc02404e1.pdf [file c7tc02404e1.pdf]

## Supplementary Information

### **Correlation between Small-molecule Dependent Nanomorphology and Device Performance of Organic Light-Emitting Diodes with Ternary Blend Emitting Layer**

*Odongo Francis Ngome Okello<sup>1</sup>, Young-Tae Kim<sup>1,\*</sup>, Hyeon-Dong Lee<sup>1</sup>,  
Young-Hoon Kim<sup>2</sup>, Tae-Woo Lee<sup>2,3,4</sup>, and Chan-Gyung Park<sup>1,5,\*</sup>*

<sup>1</sup>Department of Material Science and Engineering, Pohang University of Science and Technology (POSTECH), Pohang 790-784, South Korea

<sup>2</sup>Research Institute of Advanced Materials, Seoul National University, 1 Gwanak-ro, Gwanak-gu, Seoul 08826, Republic of Korea

<sup>3</sup>BK21PLUS SNU Materials Division for Education Creative Global Leaders, Seoul National University, 1 Gwana-ro, Gwanak-gu, Seoul 08826, Republic of Korea

<sup>4</sup>Department of Material Science and Engineering, Seoul National University, 1 Gwanak-ro, Gwanak-gu, Seoul 08826, Republic of Korea

<sup>5</sup>National Institute for Nanomaterials Technology (NINT), Pohang University of Science and Technology (POSTECH), Pohang 790-784, South Korea

\*Correspondence and requests for materials should be addressed to Y.-T.Kim (email: [yt1001@postech.ac.kr](mailto:yt1001@postech.ac.kr)) or to C.G.P (email: [cgpark1@postech.ac.kr](mailto:cgpark1@postech.ac.kr))

**Table S1** Physical properties of materials used in the experiment<sup>3</sup>

| Molecule             | Chemical Structure | Electronic Property | Band gap (eV) | Homo (eV) | Lumo (eV) | Triplet Energy (eV) | Dipole moment (D) | Molecular weight (g/mol) |
|----------------------|--------------------|---------------------|---------------|-----------|-----------|---------------------|-------------------|--------------------------|
| CBP                  |                    | HTM/ETL             | 3.1           | 6         | 2.9       | 2.6                 | ~0.0              | 484.89                   |
| PBD                  |                    | ET/HBL              | 3.8           | 6.2       | 2.4       | 2.6                 | ~                 | 298.34                   |
| TCTA                 |                    | HTM                 | 3.3           | 5.7       | 2.4       | 2.86                | 3.0               | 740.89                   |
| TPBI                 |                    | ET/HBL              | 3.5           | 6.3       | 2.8       | 2.8                 | 3.4               | 654.76                   |
| 3TPYMB               |                    | ET/HBL              | 3.5           | 6.8       | 3.3       | 2.87                | 3.5               | 599.61                   |
| Ir(ppy) <sub>3</sub> |                    | Dopant              | 2.6           | 5.6       | 3.0       | 2.4                 | 6.26              | 654.78                   |

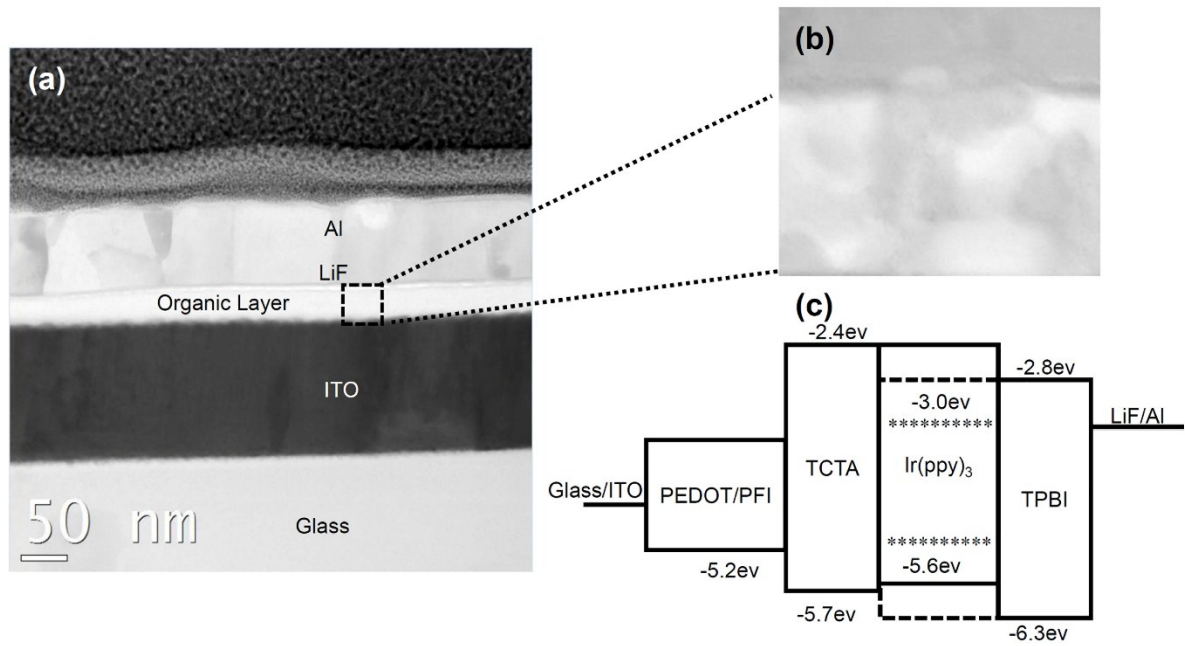

**Fig. S1** Shows (a) TEM Cross-sectional image of TCTA:TPBI:Ir(ppy)<sub>3</sub> based device structure comprising of PEDOT:PSS:PIF/EML/TPBI/LiF/Al, (b) magnified image of the EML (c) energy band diagram of the green OLED.

**Table S2** Physical properties of solvents in study<sup>57,58</sup>

| Solvent Type          | Boiling point (C) | Dipole moment (D) | Evaporation rate | Vapor Pressure 20(hPa) | HB (cal/cm <sup>3</sup> ) <sup>1/2</sup> | HS (Mpa) <sup>1/2</sup> |
|-----------------------|-------------------|-------------------|------------------|------------------------|------------------------------------------|-------------------------|
| Dichlorobenzene (DCB) | 180               | 2.27              | <1               | 1.33                   | 10                                       | 20.5                    |
| Chlorobenzene (CB)    | 131.7             | 1.54              | 1.07             | 12                     | 9.5                                      | 19.6                    |
| Toluene(T)            | 110.6             | 0.43              | 6.1              | 29                     | 8.9                                      | 18.2                    |

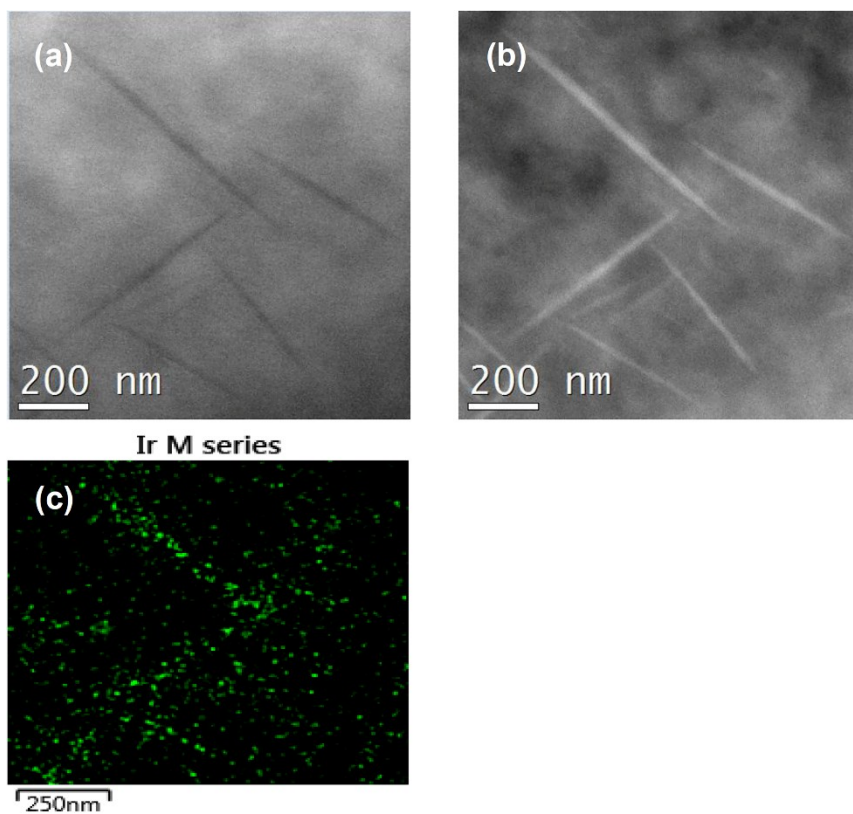

**Fig. S2** TEM results: (a) BF image (b) HAADF image and (c) EDS mapping showing the Ir(ppy)<sub>3</sub> needle-like aggregate observed in TCTA:TPBI:Ir(ppy)<sub>3</sub> ternary blend emitting layer.

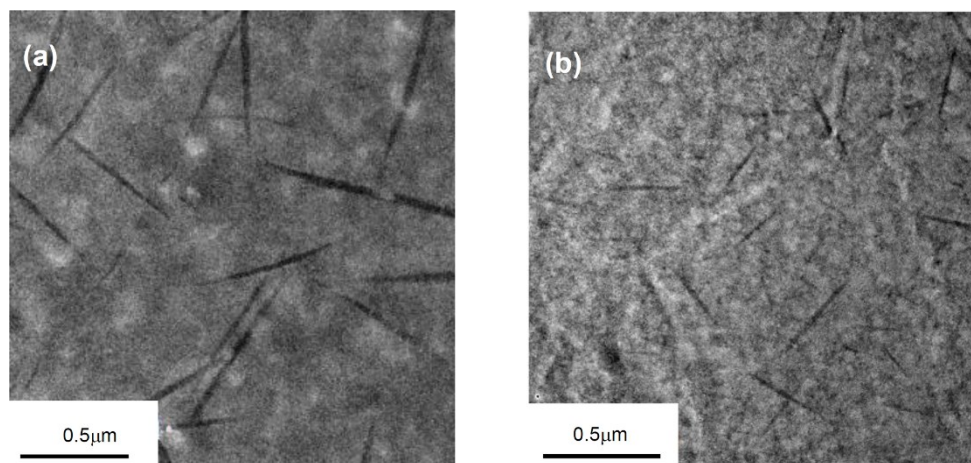

**Fig. S3** TEM BF image of (a) polymer-small molecule (PVK:3TPYMB:Ir(ppy)<sub>3</sub>), and (b) small molecule based (TCTA:3TPYMB:Ir(ppy)<sub>3</sub>) emitting layer. The ppy)<sub>3</sub> needle-like aggregates are more pronounced in the polymer-small molecule based EML compared to small molecule based EML.

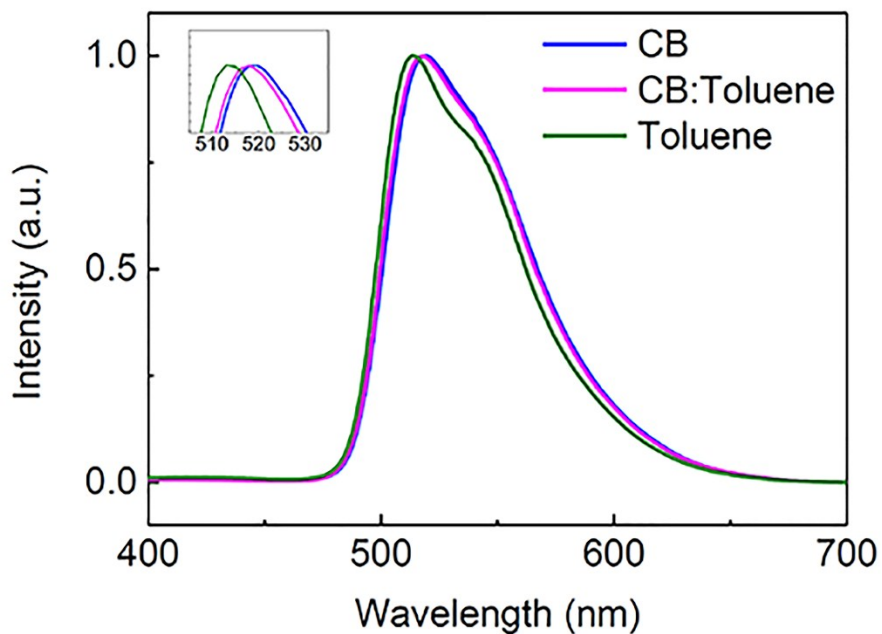

**Fig. S4** Steady state Photoluminescence spectra of the TCTA:TPBI:Ir(ppy)<sub>3</sub> based EML spin-coated in (a) Chlorobenzene (blue line), (b) 50CB:50T (pink line), and 100T (green line) solvents respectively. The blue-peak shift with increasing ratio of the toluene solvent indicates a decrease in the amount of Ir(ppy)<sub>3</sub> aggregates formed in the EML. The magnified inset image on the left is meant for clear observation.
